# Supplementary material
Source: MDPI journal article supplement (https://www.mdpi.com/1999-4907/6/6/2241)
Supplement: s1 [file s1]

Supplementary

**Table S1.** Micro-meteorological measurements for *A. pinsapo* populations along an altitudinal gradient (low elevation, 1200 m; high elevation, 1550 m) during two consecutive years. Tmax is the mean of the maximum daily temperatures; Tmin is the mean of the minimum daily temperatures; Tm is the mean temperatures (all expressed in °C). GDD stands for accumulated growing degree days. P is the monthly precipitation (mm). All the variables were measured *in situ* by two data loggers and rain gauges.

|  | Tmax | |  | Tmin | |  | Tm | |  | GDD | |  | P (mm) | |
| --- | --- | --- | --- | --- | --- | --- | --- | --- | --- | --- | --- | --- | --- | --- |
| Month | Low | High |  | Low | High |  | Low | High |  | Low | High |  | Low | High |
| Jan | 8.57 | 7.13 |  | 2.19 | 0.18 |  | 4.61 | 3.48 |  | - | - |  | 35 | 40 |
| Feb | 9.24 | 7.89 |  | 2.52 | 0.49 |  | 5.12 | 3.99 |  | 0.5 | - |  | 25 | 29 |
| Mar | 10.32 | 9.11 |  | 2.56 | 0.54 |  | 5.69 | 4.58 |  | 2 | 1 |  | 161 | 188 |
| Apr | 12.01 | 11.03 |  | 4.44 | 2.40 |  | 7.51 | 6.65 |  | 18 | 12 |  | 172 | 201 |
| May | 12.96 | 11.81 |  | 5.98 | 4.42 |  | 8.84 | 8.01 |  | 50 | 33 |  | 78 | 91 |
| Jun | 24.38 | 23.70 |  | 13.42 | 13.03 |  | 18.58 | 17.63 |  | 307 | 261 |  | 20 | 23 |
| Jul | 24.09 | 24.17 |  | 15.90 | 15.70 |  | 20.63 | 19.54 |  | 637 | 557 |  | 0 | 0 |
| Aug | 22.91 | 22.84 |  | 15.29 | 15.09 |  | 19.72 | 18.61 |  | 929 | 816 |  | 0 | 0 |
| Sep | 20.60 | 20.21 |  | 13.04 | 12.86 |  | 17.39 | 16.22 |  | - | - |  | 0 | 0 |
| Oct | 13.39 | 12.05 |  | 9.48 | 9.33 |  | 11.90 | 10.60 |  | - | - |  | 78 | 94 |
| Nov | 9.10 | 7.20 |  | 3.41 | 3.32 |  | 6.61 | 5.18 |  | - | - |  | 131 | 157 |
| Dec | 4.41 | 1.88 |  | 1.39 | 1.31 |  | 3.19 | 1.67 |  | - | - |  | 90 | 108 |
| Jan | 4.73 | 4.73 |  | -0.67 | -0.67 |  | 1.82 | 1.82 |  | - | - |  | 0 | 0 |
| Feb | 3.30 | 1.77 |  | -0.65 | -1.85 |  | 1.33 | -0.04 |  | - | - |  | 0 | 0 |
| Mar | 8.16 | 5.66 |  | 3.57 | 2.79 |  | 5.77 | 4.17 |  | 10 | 1 |  | 166 | 199 |
| Apr | 14.78 | 11.05 |  | 7.86 | 5.00 |  | 11.50 | 7.94 |  | 73 | 22 |  | 49 | 59 |
| May | 17.49 | 16.64 |  | 10.72 | 9.61 |  | 14.25 | 13.05 |  | 207 | 128 |  | 0 | 0 |
| Jun | 22.17 | 22.27 |  | 14.53 | 13.51 |  | 18.37 | 17.60 |  | 458 | 356 |  | 0 | 0 |
| Jul | 24.54 | 24.38 |  | 17.39 | 16.16 |  | 21.07 | 19.99 |  | 801 | 665 |  | 0 | 0 |
| Aug | 23.96 | 24.16 |  | 17.13 | 16.19 |  | 20.61 | 19.71 |  | 1130 | 966 |  | 0 | 0 |
| Sep | 18.69 | 17.47 |  | 13.09 | 11.07 |  | 15.91 | 13.55 |  | - | - |  | 0 | 0 |
| Oct | 13.67 | 12.86 |  | 9.73 | 7.61 |  | 11.75 | 9.97 |  | - | - |  | 77 | 81 |
| Nov | 7.09 | 5.78 |  | 4.05 | 2.00 |  | 5.59 | 4.07 |  | - | - |  | 91 | 95 |
| Dec | 5.41 | 4.61 |  | 3.13 | -0.73 |  | 4.21 | 2.36 |  | - | - |  | 34 | 36 |

**FigureS1.** Foliar nutrient content of two years-old needles of *A. pinsapo* populations along the altitudinal gradient (low elevation, 1200 m; high elevation, 1550 m).

Regression models

**Linear Regresion for xylem water potential and VPD.**

Equation: Polynomial; Linear

f=y0+a*x

| *R* | *R*sqr | Adj *R*sqr | Standard Error of Estimate |
| --- | --- | --- | --- |
| 0.5412 | 0.2929 | 0.2775 | 0.2957 |

|  | Coefficient | Std. Error | *t* | *P* | VIF |
| --- | --- | --- | --- | --- | --- |
| y0 | −0.9655 | 0.0923 | 10.4584 | <0.0001 | 4.6775< |
| a | −0.4495 | 0.103 | −4.3653 | <0.0001 | 4.6775< |

Analysis of Variance:

Uncorrected for the mean of the observations:

|  | DF | SS | MS |
| --- | --- | --- | --- |
| Regression | 2 | 85.6611 | 42.8306 |
| Residual | 46 | 4.0231 | 0.0875 |
| Total | 48 | 89.6842 | 1.8684 |

Corrected for the mean of the observations:

|  | DF | SS | MS | F | *P* |
| --- | --- | --- | --- | --- | --- |
| Regression | 1 | 1.6666 | 1.6666 | 19.056 | <0.0001 |
| Residual | 46 | 4.0231 | 0.0875 |  |  |
| Total | 47 | 5.6897 | 0.1211 |  |  |

Exponential Regresion for stomatal conductance and VPD.

Equation: Exponential Decay; Single, 2 Parameter

f = a*exp(−b*x)

| *R* | *R*sqr | Adj *R*sqr | Standard Error of Estimate |
| --- | --- | --- | --- |
| 0.5994 | 0.3593 | 0.342 | 0.1444 |

|  | Coefficient | Std. Error | *t* | *P* | VIF |
| --- | --- | --- | --- | --- | --- |
| a | 0.726 | 0.1979 | 3.6678 | 0.0008 | 8.1073< |
| b | 1.3826 | 0.3757 | 3.6799 | 0.0007 | 8.1073< |

Analysis of Variance:

Uncorrected for the mean of the observations:

|  | DF | SS | MS |
| --- | --- | --- | --- |
| Regression | 2 | 2.2731 | 1.1366 |
| Residual | 37 | 0.7712 | 0.0208 |
| Total | 39 | 3.0443 | 0.0781 |

Corrected for the mean of the observations:

|  | DF | SS | MS | F | *P* |
| --- | --- | --- | --- | --- | --- |
| Regression | 1 | 0.4324 | 0.4324 | 20.7475 | <0.0001 |
| Residual | 37 | 0.7712 | 0.0208 |  |  |
| Total | 38 | 1.2036 | 0.0317 |  |  |

**Logarithmic Regression for soil water content and stomatal conductance**

Equation: Logarithm; 2 Parameter I

f=if(x>0; y0+a*ln(abs(x)); 0)

| *R* | *R*sqr | Adj *R*sqr | Standard Error of Estimate |
| --- | --- | --- | --- |
| 0.6901 | 0.4762 | 0.462 | 0.1305 |

|  | Coefficient | Std. Error | *t* | *P* | VIF |
| --- | --- | --- | --- | --- | --- |
| y0 | −0.6269 | 0.147 | −4.2634 | 0.0001 | 49.4875< |
| a | 0.3194 | 0.0551 | 5.7998 | <0.0001 | 49.4875< |

Analysis of Variance:

Uncorrected for the mean of the observations:

|  | DF | SS | MS |
| --- | --- | --- | --- |
| Regression | 2 | 2.4139 | 1.2069 |
| Residual | 37 | 0.6304 | 0.017 |
| Total | 39 | 3.0443 | 0.0781 |

Corrected for the mean of the observations:

|  | DF | SS | MS | F | *P* |
| --- | --- | --- | --- | --- | --- |
| Regression | 1 | 0.5731 | 0.5731 | 33.6378 | <0.0001 |
| Residual | 37 | 0.6304 | 0.017 |  |  |
| Total | 38 | 1.2036 | 0.0317 |  |  |

**Logarithmic Regression for soil water content and xylem water potential**

Equation: Logarithm; 2 Parameter I

f=if(x>0; y0+a*ln(abs(x)); 0)

| *R* | *R*sqr | Adj *R*sqr | Standard Error of Estimate |
| --- | --- | --- | --- |
| 0.716 | 0.5127 | 0.5021 | 0.2507 |

|  | Coefficient | Std. Error | *t* | *P* | VIF |
| --- | --- | --- | --- | --- | --- |
| y0 | −2.9514 | 0.2346 | −12.5802 | <0.0001 | 42.0354< |
| a | 0.6008 | 0.0864 | 6.9562 | <0.0001 | 42.0354< |

Analysis of Variance:

Uncorrected for the mean of the observations:

|  | DF | SS | MS |
| --- | --- | --- | --- |
| Regression | 2 | 89.0987 | 44.5493 |
| Residual | 46 | 2.8912 | 0.0629 |
| Total | 48 | 91.9899 | 1.9165 |

Corrected for the mean of the observations:

|  | DF | SS | MS | F | *P* |
| --- | --- | --- | --- | --- | --- |
| Regression | 1 | 3.0413 | 3.0413 | 48.3886 | <0.0001 |
| Residual | 46 | 2.8912 | 0.0629 |  |  |
| Total | 47 | 5.9325 | 0.1262 |  |  |
